# Supplementary material for: Scutellariae Radix and Coptidis Rhizoma Improve Glucose and Lipid Metabolism in T2DM Rats via Regulation of the Metabolic Profiling and MAPK/PI3K/Akt Signaling Pathway
Source: PubMed Central journal article supplement (PMC6274950; doi:10.3390/ijms19113634), 2018-11-18
Supplement: ijms-19-03634-s001.pdf [file ijms-19-03634-s001.pdf]

**Table S1.** Primer sequences used in real-time PCR.

| mRNA  | Primer  | Sequence               | Accession Number |
|-------|---------|------------------------|------------------|
| JNK   | Forward | CTGAAGCAGAAGCTCCACCA   | XM_012812663.2   |
|       | Reverse | GCTGCCCCCGTATAACTCC    |                  |
| P65   | Forward | CCATACGCTGACCCTAGCCT   | NM_199267.2      |
|       | Reverse | CGATCGTCTGTGTCTGGCAAGT |                  |
| IRS1  | Forward | CGCTACATCCCAGGTGCTAC   | NM_012969.1      |
|       | Reverse | GAAACCACTGAGGACTGCGA   |                  |
| IKK   | Forward | GGAGTTTGGCATCACATCGG   | AF_115282.1      |
|       | Reverse | ATCGGGCTCCTCTGTAGGTC   |                  |
| PI3K  | Forward | ATGACAAGGAACAGCTCCGA   | NM_133399.2      |
|       | Reverse | GCAGTACATCTGGGCCACTT   |                  |
| Akt2  | Forward | CAGGCACCCCTTCCTTACAG   | NM_017093.1      |
|       | Reverse | GGTACACCACATCCGTCGAG   |                  |
| Glut2 | Forward | TCAGATGAAGGCCACCCATT   | NM_031831.1      |
|       | Reverse | AACACCCACATCAACACTGC   |                  |
| P38   | Forward | CTGCGAGGGCTGAAGTAT     | XM_003803280.3   |
|       | Reverse | TCCTCTTATCCGAGTCCAA    |                  |
| ERK   | Forward | GGACCTGAAGCCCTCCAATC   | NM_017347.2      |
|       | Reverse | CCAGAACCGTCTACCAGAGC   |                  |
| C-fos | Forward | GGCAGAAGGGGCAAAGTAGA   | NM_022197.2      |
|       | Reverse | AGTTGATCTGTCTCCGCTTGG  |                  |
| C-jun | Forward | CGCCCTAGCTGAACTGCATA   | NM_021835.3      |
|       | Reverse | AAGTTGCTGAGGTTGGCGTA   |                  |

**Table S2.** Potential biomarkers of P, SR, CR, LSC and HSC treated diabetic rats.

| No | tr/min | [M±H] <sup>a</sup> | Metabolites               | Model            | Effects of test drugs |                |                |                 |                  | Pathway                           | Resource | Ion mode |
|----|--------|--------------------|---------------------------|------------------|-----------------------|----------------|----------------|-----------------|------------------|-----------------------------------|----------|----------|
|    |        |                    |                           | M/N              | P                     | SR             | CR             | LSC             | HSC              |                                   |          |          |
| 1  | 4.39   | 407.2792           | Cholic acid               | ↑ <sup>###</sup> | ↓ <sup>***</sup>      | ↓ <sup>*</sup> | ↓ <sup>*</sup> | ↓ <sup>**</sup> | ↓ <sup>***</sup> | Primary bile acid biosynthesis    | plasma   | ESI-     |
| 2  | 6.00   | 391.2849           | Deoxycholic acid          | ↑ <sup>###</sup> | ↓ <sup>***</sup>      | ↓ <sup>*</sup> | ↓ <sup>*</sup> | ↓ <sup>**</sup> | ↓ <sup>***</sup> | Primary bile acid biosynthesis    | plasma   | ESI-     |
| 3  | 7.26   | 480.3092           | LysoPE(0:0/18:0)          | ↓ <sup>###</sup> | ↑ <sup>***</sup>      | ↑ <sup>*</sup> | ↑ <sup>*</sup> | ↑ <sup>**</sup> | ↑ <sup>**</sup>  | Glycerophospholipid metabolism    | plasma   | ESI-     |
| 4  | 7.61   | 540.3302           | LyspPC(16:0)              | ↓ <sup>###</sup> | ↑ <sup>***</sup>      | ↑ <sup>*</sup> | ↑ <sup>*</sup> | ↑ <sup>*</sup>  | ↑ <sup>**</sup>  | Glycerophospholipid metabolism    | plasma   | ESI-     |
| 5  | 6.70   | 504.3101           | LysoPE(20:2(11Z,14Z)/0:0) | ↓ <sup>###</sup> | ↑ <sup>***</sup>      | ↑ <sup>*</sup> | ↑ <sup>*</sup> | ↑ <sup>*</sup>  | ↑ <sup>**</sup>  | Glycerophospholipid metabolism    | plasma   | ESI-     |
| 6  | 4.30   | 283.0688           | Xanthosine                | ↑ <sup>#</sup>   | ↓ <sup>**</sup>       | ↓              | ↓              | ↓ <sup>*</sup>  | ↓ <sup>**</sup>  | Purine metabolism                 | urine    | ESI-     |
| 7  | 5.94   | 201.0219           | Hippuric acid             | ↓ <sup>#</sup>   | ↑ <sup>**</sup>       | ↑ <sup>*</sup> | ↑              | ↑ <sup>*</sup>  | ↑ <sup>**</sup>  | Phenylalanine metabolism          | urine    | ESI-     |
| 8  | 3.22   | 222.0806           | N-acetyl-L-tyrosine       | ↓ <sup>#</sup>   | ↑ <sup>**</sup>       | ↑              | ↑ <sup>*</sup> | ↑ <sup>*</sup>  | ↑ <sup>**</sup>  | Tyrosine metabolism               | urine    | ESI-     |
| 9  | 3.60   | 175.0243           | D-glucurono-6,3-lactone   | ↑ <sup>#</sup>   | ↓ <sup>**</sup>       | ↓ <sup>*</sup> | ↓ <sup>*</sup> | ↓ <sup>*</sup>  | ↓ <sup>**</sup>  | Ascorbate and aldarate metabolism | urine    | ESI-     |
| 10 | 6.92   | 520.3410           | LysoPC(18:2(9z,12z))      | ↓ <sup>***</sup> | ↑ <sup>**</sup>       | ↑ <sup>*</sup> | ↑ <sup>*</sup> | ↑ <sup>*</sup>  | ↑ <sup>**</sup>  | Glycerophospholipid metabolism    | plasma   | ESI+     |
| 11 | 12.82  | 758.5731           | PC(16:1(9z)/18:1(11z))    | ↓ <sup>***</sup> | ↑ <sup>**</sup>       | ↑ <sup>*</sup> | ↑ <sup>*</sup> | ↑ <sup>*</sup>  | ↑ <sup>**</sup>  | arachidonic acid metabolism       | plasma   | ESI+     |
| 12 | 6.41   | 494.3239           | LysoPC(16:1(9z))          | ↓ <sup>***</sup> | ↑ <sup>**</sup>       | ↑ <sup>*</sup> | ↑ <sup>*</sup> | ↑ <sup>*</sup>  | ↑ <sup>**</sup>  | Glycerophospholipid metabolism    | plasma   | ESI+     |
| 13 | 6.00   | 468.3096           | Glycocholic acid          | ↓ <sup>***</sup> | ↑ <sup>**</sup>       | ↑ <sup>*</sup> | ↑ <sup>*</sup> | ↑ <sup>**</sup> | ↑ <sup>**</sup>  | Primary bile acid biosynthesis    | plasma   | ESI+     |
| 14 | 1.01   | 229.1525           | Deoxyuridine              | ↑ <sup>***</sup> | ↓ <sup>**</sup>       | ↓ <sup>*</sup> | ↓ <sup>*</sup> | ↓ <sup>*</sup>  | ↓ <sup>**</sup>  | Pyrimidine metabolism             | urine    | ESI+     |

↑ indicates increase; ↓ indicates decrease. N: Normal group; M: Model group; P: metformin group; SR: Scutellaria Radix group; CR: Coptidis Rhizome group; LSC: Low dose of combined extracts group; HSC: High dose of combined extracts group. # indicates significant change of M VS N (###, P<0.001; ##, P<0.01; #, P<0.05); \* Indicates significant change of different treatment groups VS M (\*\**p* <0.001; \*\* *p* <0.01; \* *p* <0.05).
